# Supplementary material for: RNA-seq based gene expression analysis of ovarian granulosa cells exposed to zearalenone in vitro: significance to steroidogenesis
Source: PubMed Central journal article supplement (PMC5609980; doi:10.18632/oncotarget.19699), 2017-07-31
Supplement: oncotarget-08-64001-s001.pdf [file oncotarget-08-64001-s001.pdf]

# RNA-seq based gene expression analysis of ovarian granulosa cells exposed to zearalenone *in vitro*: significance to steroidogenesis

## SUPPLEMENTARY MATERIALS

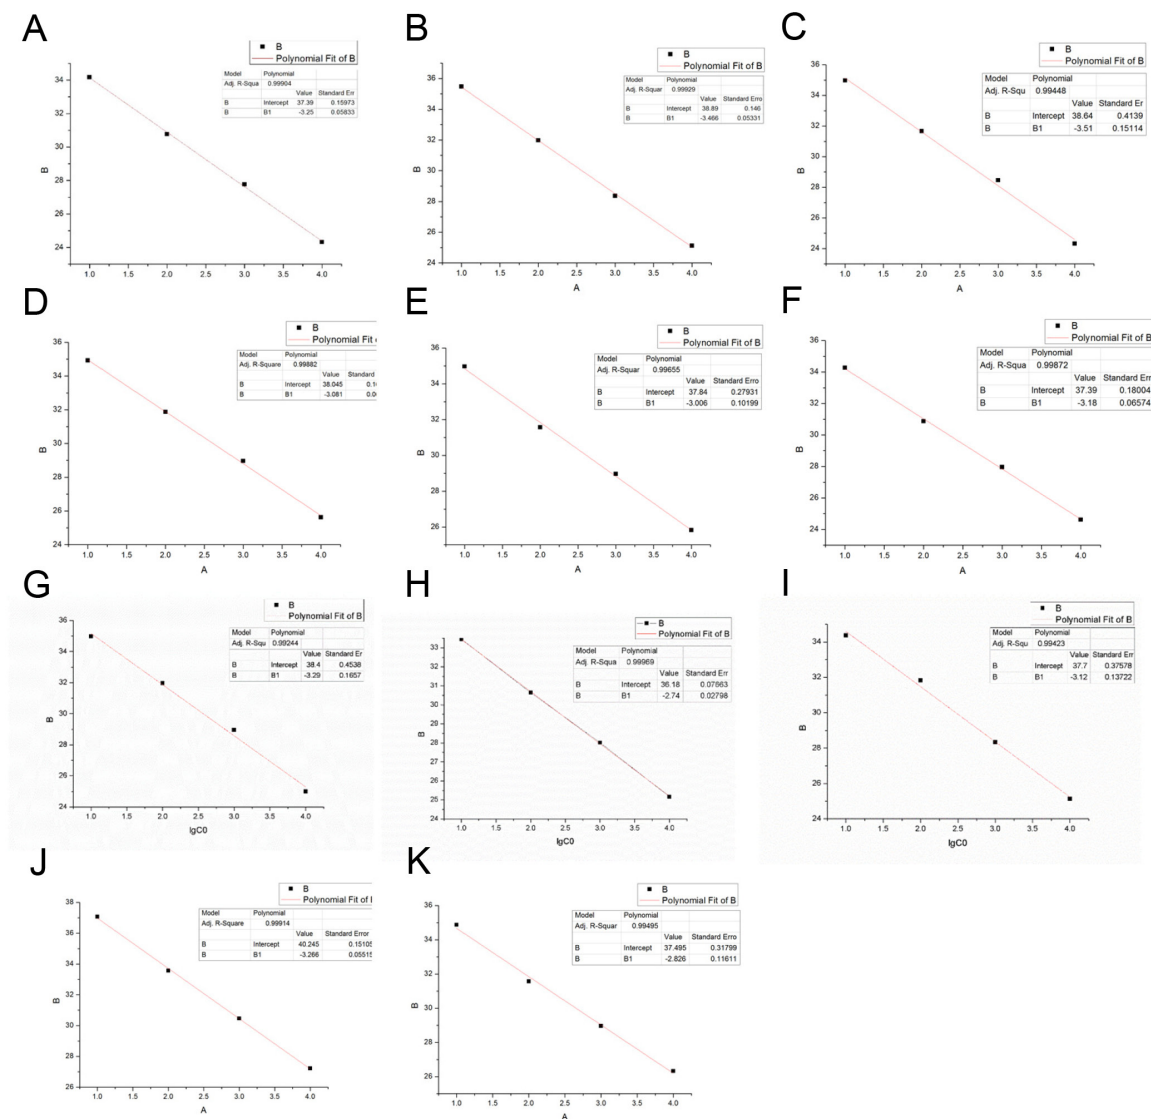

Supplementary Figure 1: The standard curve and primer efficiency of all the Q-PCR primers. (A-K) represent the standard curve and primer efficiency of *TGF-β*, *BDNF*, *IER-3*, *EDN-1*, *IGF-1*, *SFRP-2*, *CYP19A1*, *FSHR*, *HSD17β*, *Bax* and *Bcl-2* genes.

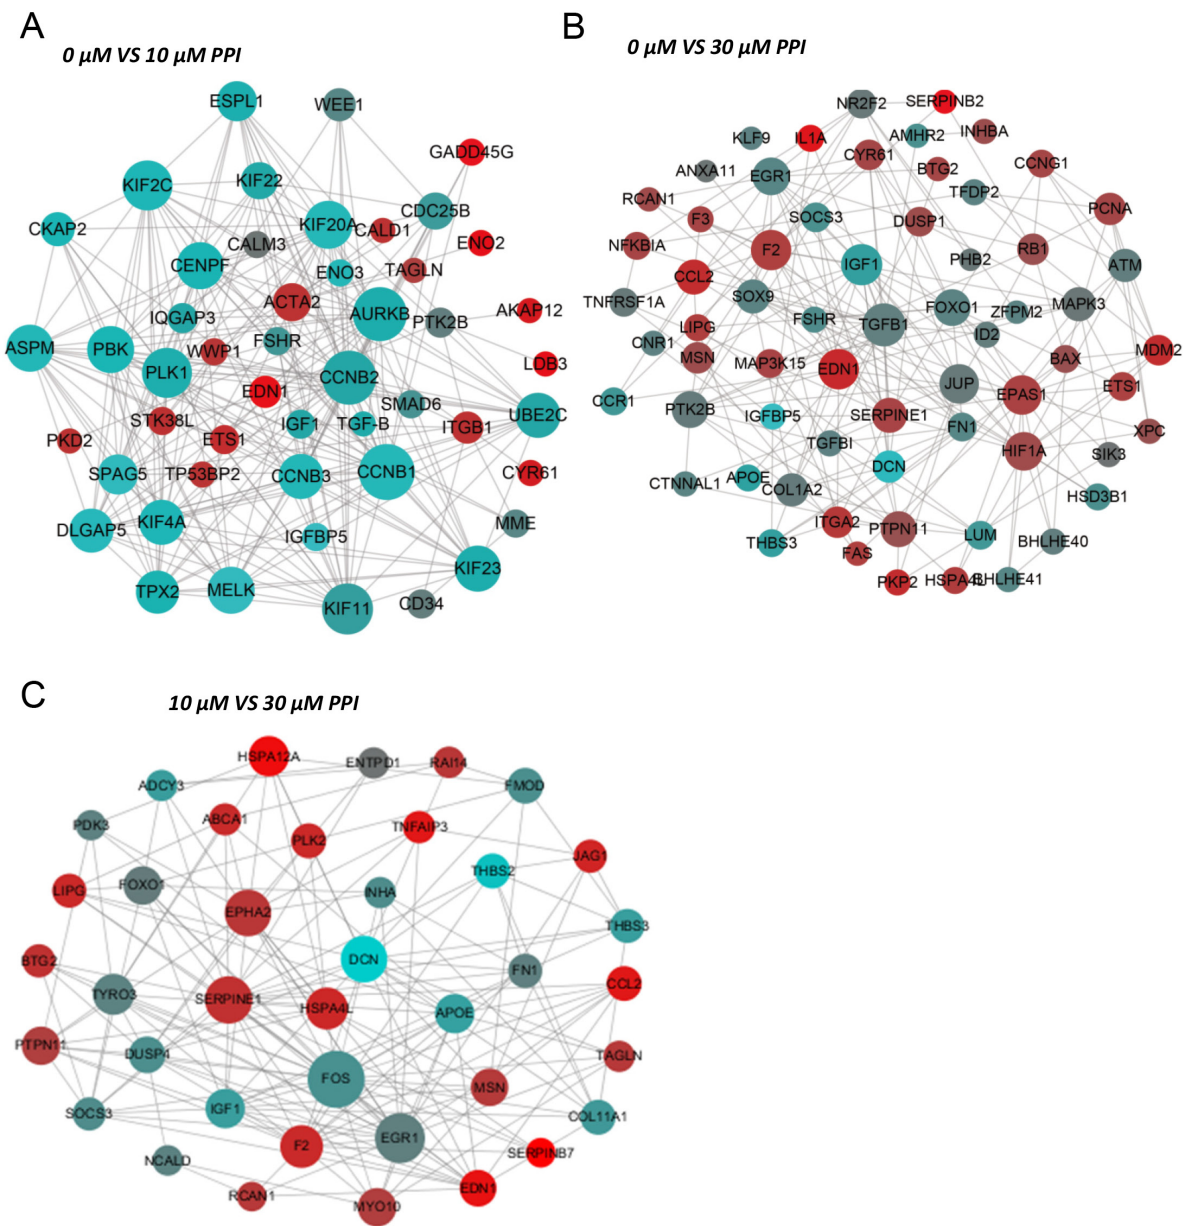

**Supplementary Figure 2: Protein-protein interaction (PPI) network based on the Search Tool for the Retrieval of Interacting Genes (STRING) database to annotate functional interactions between different expression genes in ZEA-treatment and control groups.** The 120 genes in 10 μM and 30 μM ZEA treatment group and node degree  $\geq 20$  was selected as the threshold. Red points represent genes up-regulated and blue points represent genes down-regulated in every two groups.

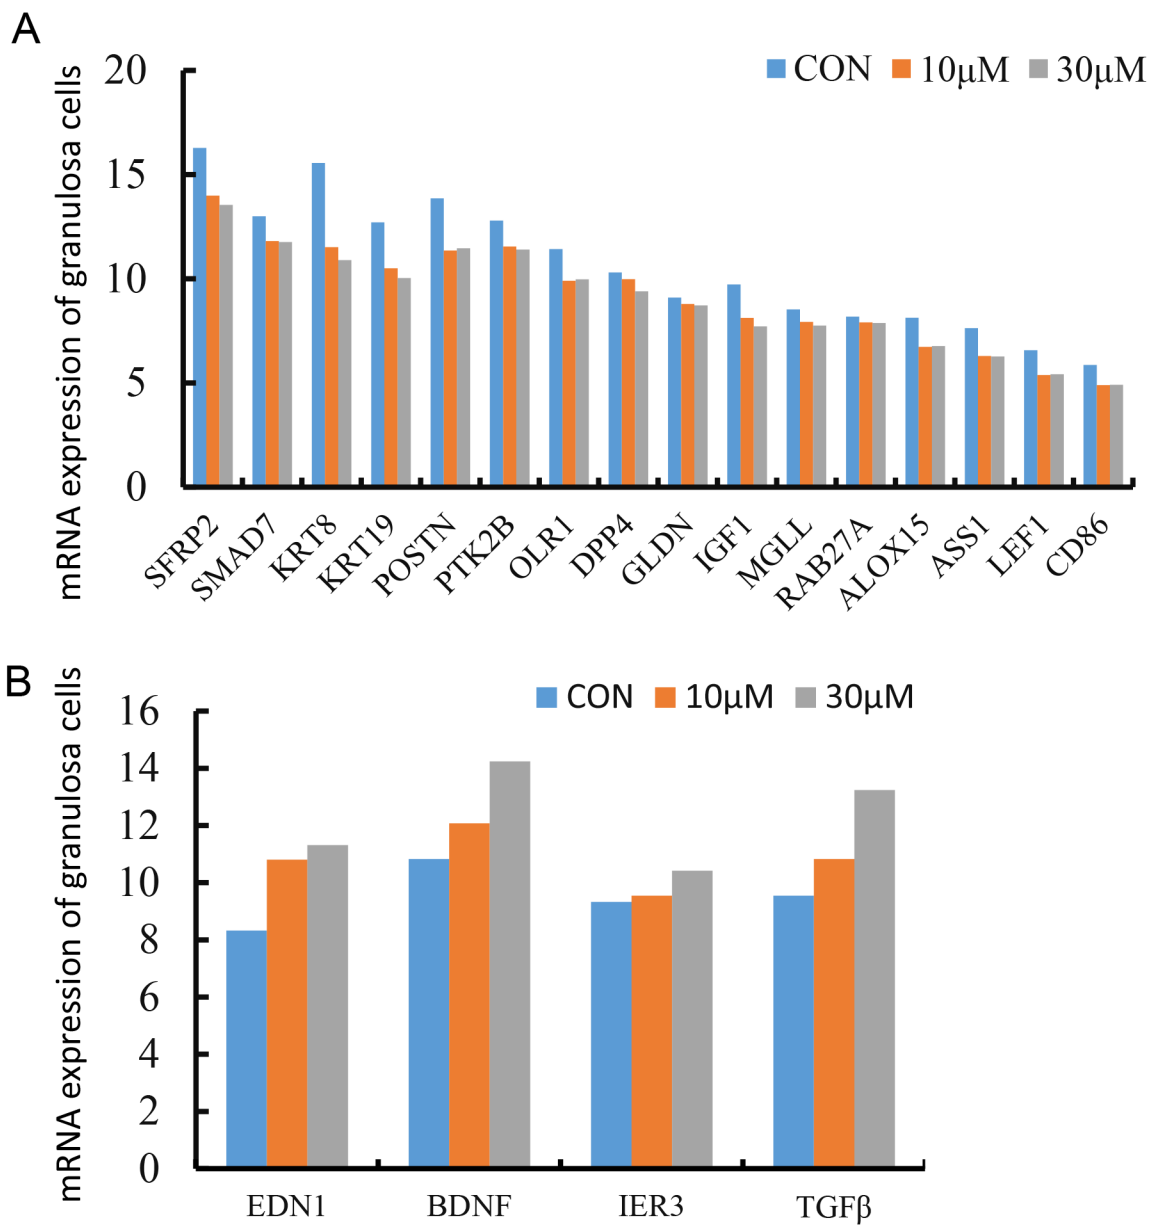

**Supplementary Figure 3:** (A) Part of declined expression genes between control and ZEA-treatment groups. (B) The increased expression genes in ZEA-treatment groups. Node degree  $\geq 20$  was selected as the threshold.

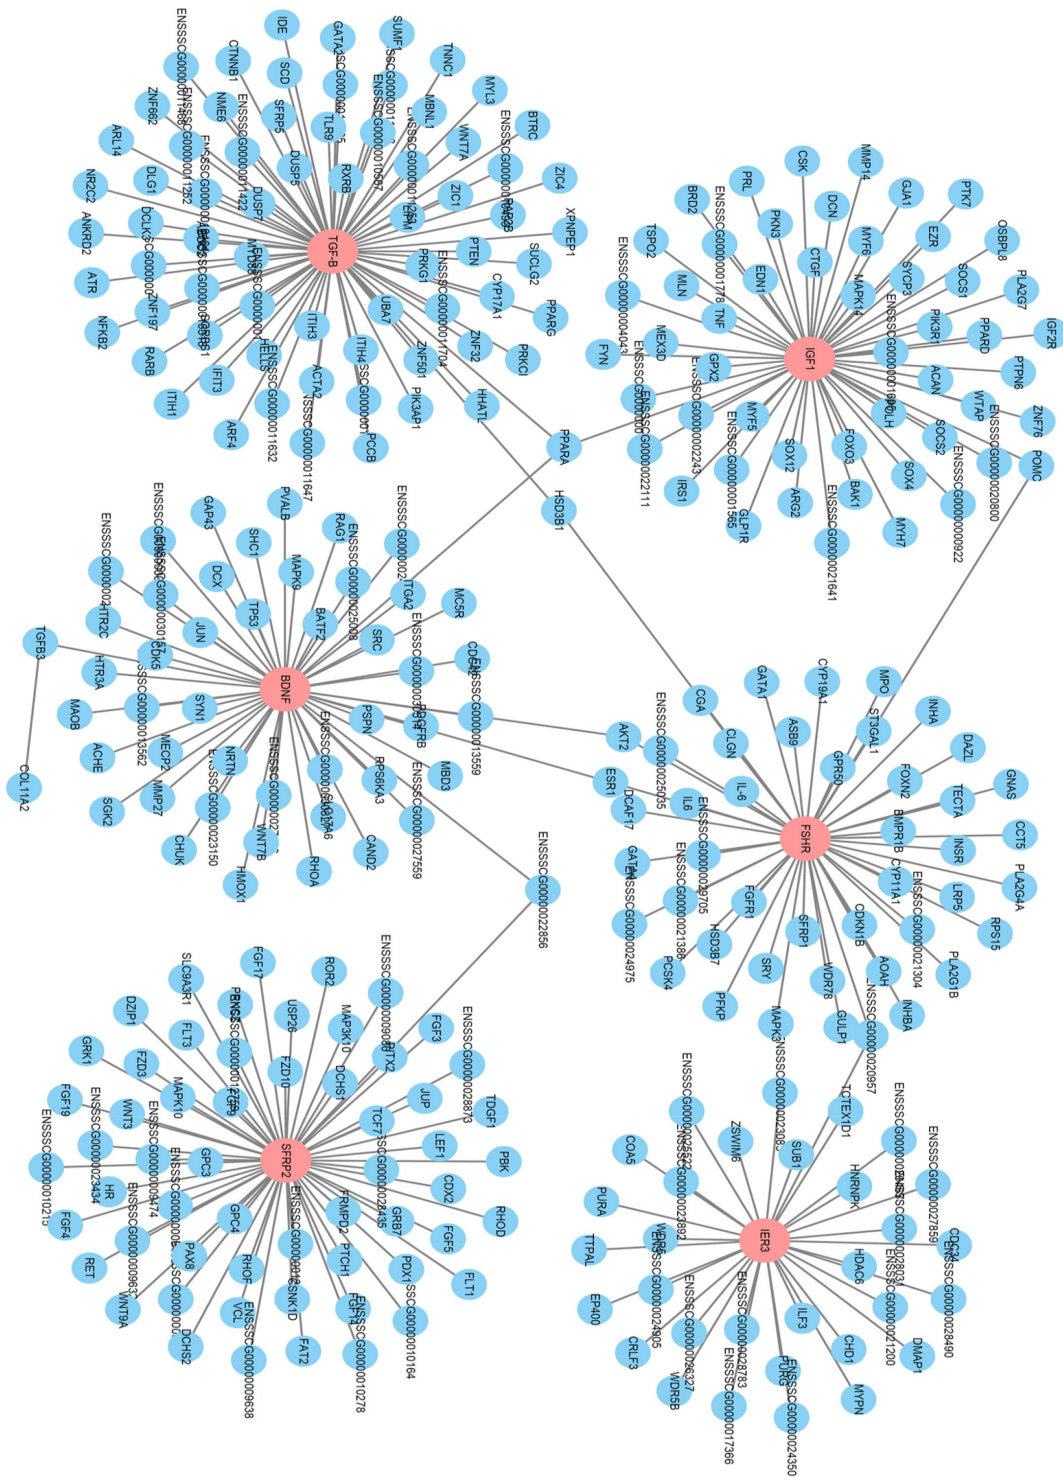

**Supplementary Figure 4: PPI network based on the STRING database to annotate functional interactions between apoptosis-related genes in ZEA-treatment groups.** We obtained 6 core differentially expression genes between control and ZEA-treated groups. Node degree  $\geq 20$  was selected as the threshold.

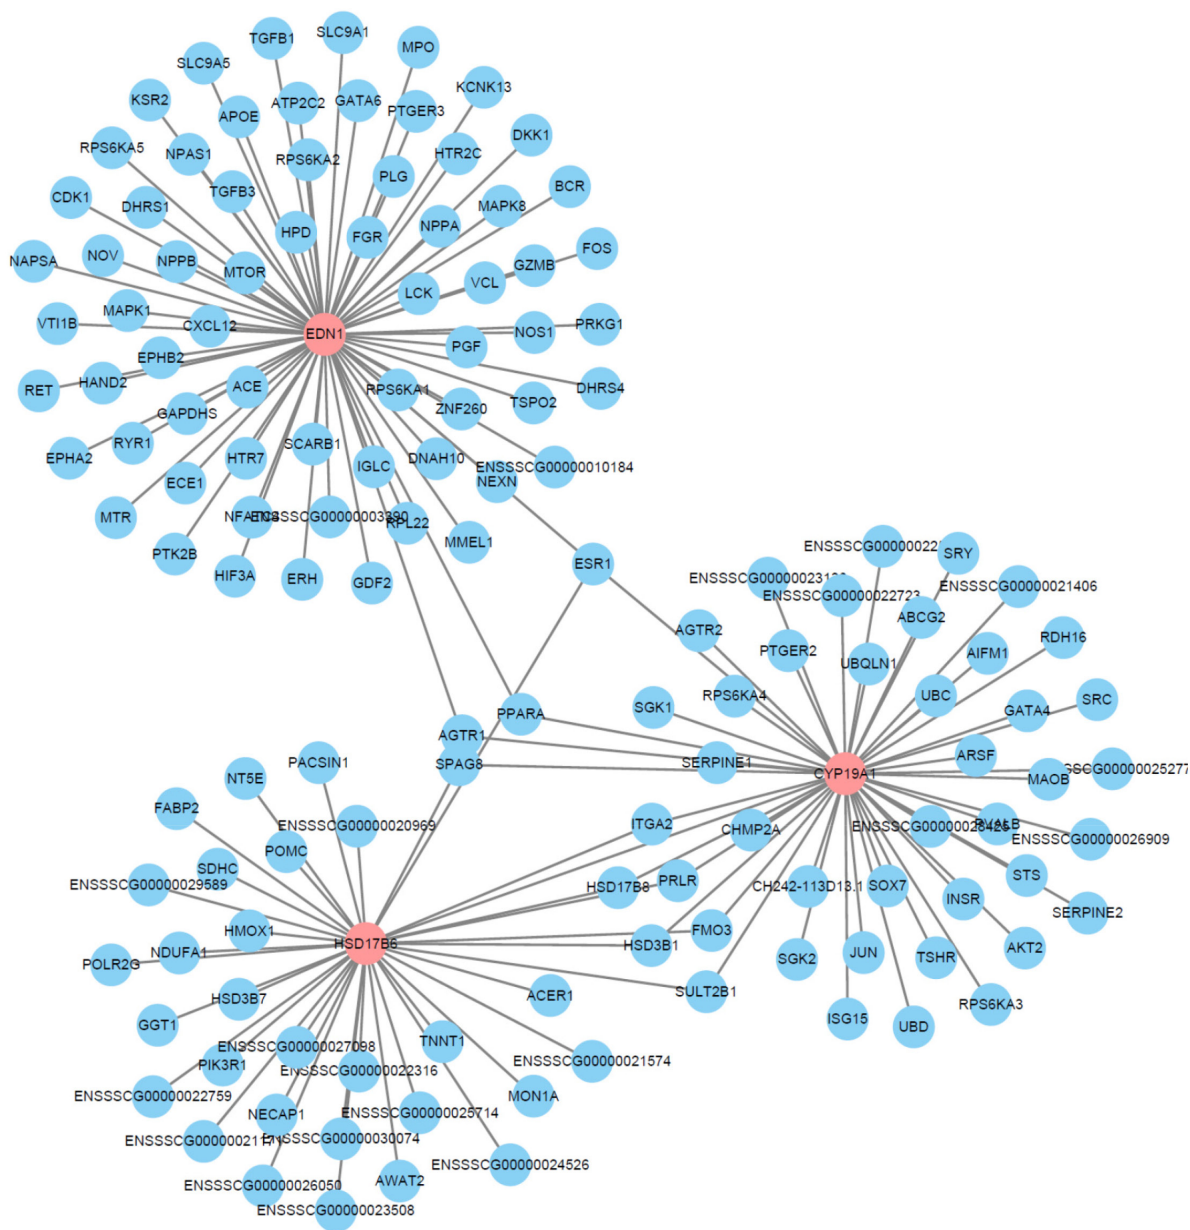

**Supplementary Figure 5: PPI network based on the STRING database to annotate functional interactions between steroidogenesis-related genes in ZEA-treatment groups.** We obtained 3 core differentially expression genes between control and ZEA-treated groups. Node degree  $\geq 20$  was selected as the threshold.

Supplementary Table 1: Primers used for quantitative-PCR

| Genes          | Sequences of primers                                             | Production(bp) | Genbank        |
|----------------|------------------------------------------------------------------|----------------|----------------|
| <i>CYP19A1</i> | F:5'- GATGCTGCATTGTCACTGCT -3'<br>R:5'-GGGAAGGTGTCACTCAAGGA-3'   | 238            | KF_314685      |
| <i>FSHR</i>    | F:5'- CGCTGGAAAGATGGCATAACC-3'<br>R:5'- GCTCACCTTCATGTAGCTGC -3' | 155            | GU_990798      |
| <i>HSD17β</i>  | F:5'- TGATGGACTTCACCTGTGCT -3'<br>R:5'- GGCATGATCCCAGCATTCAG -3' | 207            | NM_001185137   |
| <i>TGF-β</i>   | F:5'-AGGAAACCCATAATGCCCCA-3'<br>R:5'- TGGGCCCTATGGATAGCTG-3'     | 208            | NM_214015.2    |
| <i>EDN-1</i>   | F:5'- CTCCTTTGCGGTGATGATGG-3'<br>R:5'- GGTGTGGACTTGGGTGTTTC-3'   | 174            | NM_213882.1    |
| <i>IGF-1</i>   | F:5'- TCCTGGAGTTGGTAGATTGCT-3'<br>R:5'- ACGAATGTCTCTAGCAGCCA-3'  | 224            | NM_214256.1    |
| <i>SFRP-2</i>  | F:5'- GGCCTCAGGAATGGATAGCT-3'<br>R:5'- CCCCAAACATCACACCCAAG-3'   | 165            | NM_001244395.1 |
| <i>IER-3</i>   | F:5'- AGATCGAAGGCCAAGGACAA-3'<br>R:5'- AGGGATGGAGAAAACCTCGGG-3'  | 154            | XM_001927551.3 |
| <i>BDNF</i>    | F:5'-CCTGGATGCTGCAAACATGT-3'<br>R:5'-CCCTCCTTTGTGTACCCCAT-3'     | 226            | NM_214259.2    |
| <i>Bax</i>     | F:5'-ATGCGTCCAAGGAAGACTGAG-3'<br>R:5'-CCCCAGTTGAAGTTGCCATCAG-3'  | 198            | XM_003127290.4 |
| <i>Bcl-2</i>   | F:5'-GCAGAGATGTCCAGTCAG-3'<br>R:5'-CACCGAACTCAAAGAAGG-3'         | 166            | XM_003121700.4 |
| <i>GAPDH</i>   | F:5'-CCCCTTCATTGACCTCCACT-3'<br>R:5'-CCATTTGATGTTGGCGGGAT-3'     | 157            | NM_001206359.1 |
